# Supplementary material for: Genomic analysis of the nomenclatural type strain of the nematode-associated entomopathogenic bacterium Providencia vermicola
Source: BMC Genomics. 2021 Oct 2;22:708. doi: 10.1186/s12864-021-08027-w (PMC8487129; doi:10.1186/s12864-021-08027-w)
Supplement: Supplementary file 6 — Additional file 6: Suppl. Table S1. Pair-wise sequence similarity (in %) matrices for hMLST (upper right) and rMLST (lower left) data sets across the genus Providencia. [file 12864_2021_8027_MOESM6_ESM.xlsx]

## Sheet: SupplTable S1 pDist
Suppl. Table S1. Pair-wise sequence similarity (in %) matrices for hMLST (upper right) and rMLST (lower left) data sets across the genus Providencia.
	1	2	3	4	5	6	7	8	9	10	11	12	13	14	15	16	17	18	19	20	21	22	23	24	hMLST
1. Providencia_vermicola_DSM17385_TYPE		94.3	89.8	89.7	89.7	89.8	89.7	89.8	89.5	88.5	88.5	88.5	88.6	88.7	86.0	85.6	85.1	84.5	83.6	83.8	84.5	84.7	84.5	79.3	1. Providencia_vermicola_DSM17385_TYPE
2. Providencia_rettgeri_MR4	97.8		90.6	90.6	90.6	91.1	91.1	91.1	90.0	87.9	87.8	87.9	87.9	87.9	85.8	85.5	84.8	83.8	83.2	83.1	83.7	84.0	84.2	79.1	2. Providencia_rettgeri_MR4
3. Providencia_rettgeri_NCTC11801_TYPE (clade A)	97.9	97.2		99.3	99.3	95.2	95.3	95.2	94.4	89.0	89.0	89.0	89.0	89.1	86.1	85.7	85.1	84.6	84.4	84.0	84.6	84.7	84.6	79.6	3. Providencia_rettgeri_NCTC11801_TYPE (clade A)
4. Providencia_rettgeri_AR_0082 (clade A)	97.9	97.2	99.9		99.7	95.2	95.3	95.2	94.5	89.0	89.0	89.0	89.0	89.1	86.1	85.8	85.2	84.6	84.4	84.1	84.5	84.8	84.6	79.7	4. Providencia_rettgeri_AR_0082 (clade A)
5. Providencia_rettgeri_Dmel1 (clade A)	97.5	96.9	99.4	99.4		95.1	95.2	95.1	94.4	89.0	88.9	88.9	89.0	89.1	86.1	85.7	85.2	84.6	84.4	84.0	84.6	84.8	84.6	79.6	5. Providencia_rettgeri_Dmel1 (clade A)
6. Providencia_rettgeri_YPR31 (clade A)	97.8	97.3	99.2	99.2	98.7		99.4	99.4	95.2	88.9	88.9	88.9	88.9	89.0	86.4	86.2	85.3	84.7	84.1	84.2	84.6	84.6	84.6	79.5	6. Providencia_rettgeri_YPR31 (clade A)
7. Providencia_rettgeri_BML2496 (clade A)	97.7	97.3	99.1	99.1	98.9	99.9		99.5	95.4	89.0	88.9	88.9	89.0	89.1	86.5	86.2	85.3	84.8	84.0	84.1	84.7	84.6	84.5	79.4	7. Providencia_rettgeri_BML2496 (clade A)
8. Providencia_rettgeri_Pr-15-2-50 (clade A)	97.8	97.4	99.2	99.2	98.7	99.9	99.8		95.3	88.9	88.9	88.9	89.0	89.0	86.4	86.2	85.4	84.8	84.0	84.0	84.7	84.6	84.5	79.4	8. Providencia_rettgeri_Pr-15-2-50 (clade A)
9. Providencia_huaxiensis_WCHPr000369_TYPE	97.8	97.1	99.0	99.0	98.5	99.0	98.9	99.0		88.8	88.8	88.8	88.8	88.9	86.0	85.8	85.0	84.4	83.8	83.7	84.3	84.6	84.5	79.3	9. Providencia_huaxiensis_WCHPr000369_TYPE
10. Providencia_rettgeri_RB151 (clade B)	97.4	96.4	97.7	97.7	97.4	97.7	97.7	97.7	97.8		100	99.9	99.8	99.8	85.7	85.7	85.2	84.4	84.0	84.2	84.4	84.6	84.3	79.8	10. Providencia_rettgeri_RB151 (clade B)
11. Providencia_rettgeri_FDAARGOS330 (clade B)	97.5	96.5	97.8	97.8	97.4	97.8	97.7	97.8	97.8	99.9		99.9	99.9	99.8	85.6	85.7	85.2	84.4	83.9	84.2	84.4	84.6	84.3	79.8	11. Providencia_rettgeri_FDAARGOS330 (clade B)
12. Providencia_rettgeri_CCBH11880 (clade B)	97.5	96.5	97.8	97.8	97.4	97.8	97.7	97.8	97.9	99.9	100		99.8	99.8	85.6	85.7	85.2	84.4	83.9	84.2	84.4	84.6	84.3	79.8	12. Providencia_rettgeri_CCBH11880 (clade B)
13. Providencia_rettgeri_H1736 (clade B)	97.5	96.5	97.8	97.8	97.4	97.8	97.7	97.8	97.9	99.9	100	100		99.8	85.6	85.7	85.3	84.5	83.9	84.2	84.5	84.6	84.4	79.8	13. Providencia_rettgeri_H1736 (clade B)
14. Providencia_vermicola_G1	97.5	96.4	97.8	97.8	97.4	97.7	97.6	97.7	97.8	99.8	100	100	100		85.8	85.9	85.3	84.6	84.1	84.4	84.6	84.9	84.6	80.0	14. Providencia_vermicola_G1
15. Providencia_alcalifaciens_DSM30120_TYPE	97.0	96.3	97.1	97.1	96.8	97.0	97.0	97.1	97.0	96.7	96.7	96.7	96.7	96.7		89.0	84.8	84.6	83.8	83.8	84.5	84.3	84.6	79.8	15. Providencia_alcalifaciens_DSM30120_TYPE
16. Providencia_rustigianii_DSM4541_TYPE	96.3	95.7	96.4	96.4	96.0	96.4	96.4	96.4	96.3	96.2	96.2	96.2	96.2	96.2	97.3		85.0	84.6	84.2	83.6	84.6	84.6	84.6	79.6	16. Providencia_rustigianii_DSM4541_TYPE
17. Providencia_heimbachae_NCTC12003_TYPE	95.3	94.7	95.4	95.4	95.0	95.3	95.2	95.3	95.2	95.3	95.4	95.4	95.4	95.4	95.0	95.3		84.1	83.7	83.8	84.0	84.1	84.3	79.6	17. Providencia_heimbachae_NCTC12003_TYPE
18. Providencia_thailandensis_KCTC23281_TYPE	95.6	95.1	95.5	95.6	95.2	95.6	95.5	95.7	95.4	95.3	95.4	95.4	95.4	95.4	95.5	94.8	94.2		85.6	85.9	99.7	87.5	89.5	79.7	18. Providencia_thailandensis_KCTC23281_TYPE
19. Providencia_sneebia_DSM19967_TYPE	94.3	93.5	94.3	94.3	93.7	94.4	94.3	94.4	94.3	94.2	94.3	94.3	94.3	94.3	94.4	93.8	93.5	94.8		85.5	85.5	85.8	85.7	80.1	19. Providencia_sneebia_DSM19967_TYPE
20. Providencia_burhodogranariea_DSM19968_TYPE	95.2	94.6	95.2	95.2	94.8	95.1	95.0	95.2	95.1	95.1	95.2	95.2	95.2	95.2	94.9	94.9	94.8	95.9	94.6		86.0	86.1	86.0	79.6	20. Providencia_burhodogranariea_DSM19968_TYPE
21. Providencia_stuartii_NCTC11800_TYPE	95.5	95.0	95.5	95.5	95.1	95.5	95.5	95.5	95.3	95.5	95.4	95.4	95.4	95.3	95.5	94.8	94.1	99.8	94.7	95.8		87.5	89.6	79.7	21. Providencia_stuartii_NCTC11800_TYPE
22. Providencia_vermicola_LLDRA6	96.1	95.6	96.1	96.1	95.7	96.2	96.2	96.2	96.0	96.0	95.9	95.9	95.9	95.8	95.9	95.3	94.7	97.2	95.1	96.2	97.3		87.0	79.7	22. Providencia_vermicola_LLDRA6
23. Providencia_vermicola_P8538	95.8	95.3	95.6	95.6	95.3	95.7	95.7	95.7	95.4	95.6	95.5	95.5	95.5	95.5	95.6	95.0	94.3	97.7	94.6	95.9	97.8	97.5		79.9	23. Providencia_vermicola_P8538
24. Proteus_mirabilis_ATCC29906	89.4	89.6	89.5	89.5	89.1	89.5	89.3	89.5	89.4	89.3	89.4	89.4	89.4	89.4	89.4	89.1	88.6	89.6	88.6	89.1	89.5	89.4	89.4		24. Proteus_mirabilis_ATCC29906
rMLST	1	2	3	4	5	6	7	8	9	10	11	12	13	14	15	16	17	18	19	20	21	22	23	24
