# Supplementary material for: Genomic analysis of the nomenclatural type strain of the nematode-associated entomopathogenic bacterium Providencia vermicola
Source: BMC Genomics. 2021 Oct 2;22:708. doi: 10.1186/s12864-021-08027-w (PMC8487129; doi:10.1186/s12864-021-08027-w)
Supplement: Supplementary file 7 — Additional file 7: Suppl. Table S2. Putative antibiotic resistance-associated factors of P. vermicola DSM_17385 as identified in the CARD database. [file 12864_2021_8027_MOESM7_ESM.xlsx]

## Sheet: Tabelle1
Suppl. Table S2. Putative antibiotic resistance-associated factors of P. vermicola DSM_17385 as identified in the CARD database.
* Gene carrying resistance-conferring point-mutation(s).
ARO number	Acronym	Best hit in CARD (similarity/coverage)	Best hit in genus Providencia (similarity/coverage)	ARF family	Resistance mechanism	Drug class
3000002	VanW	Enterococcus faecalis VanWG (29%/97%)	Providencia rettgeri vancomycin B-type resistance protein VanW (92%/99%)	glycopeptide resistance protein	antibiotic target alteration	glycopeptides (vancomycin)
3000027	EmrA	Escherichia coli EmrA (56%/100%)	Providencia rettgeri EmrA (94%/100%)	MFS	antibiotic efflux	fluoroquinolone, nalidixic acid, thiolactomycin
3000074	EmrB	Escherichia coli EmrB (66%/99%)	Providencia rettgeri EmrB (99%/99%)	MFS	antibiotic efflux	fluoroquinolone, nalidixic acid, thiolactomycin
3000164	ErmX, Erm(34)	Corynebacterium jeikeium 23S rRNA methyltransferase ErmX (29%/95%)	Providencia rettgeri 16S rRNA methyltransferase RsmA (98%/100%)	RNA methyltransferase	antibiotic target alteration	aminoglycosides
3000207	AcrA	Escherichia coli AcrA (67%/98%)	Providencia rettgeri AcrA (95%/95%)	RND	antibiotic efflux	fluoroquinolone, cephalosporin, glycylcycline, penam, tetracycline, rifamycin, phenicols, triclosan
3000216	AcrB	Escherichia coli AcrB (75%/98%)	Providencia rettgeri AcrB (98%/100%)	RND	antibiotic efflux	fluoroquinolone, cephalosporin, glycylcycline, penam, tetracycline, rifamycin, phenicols, triclosan
3000220	GyrB*	Bartonella bacilliformis GyrB* (55%/96%)	Providencia rettgeri GyrB (99%/100%)	DNA gyrase subunit beta	antibiotic target alteration	fluoroquinolone, aminocoumarin
3000237	TolC	Escherichia coli TolC (65%/97%)	Providencia rettgeri TolC (95%/99%)	outer membrane efflux protein	antibiotic efflux	macrolide, fluoroquinolone, aminoglycosides, carbapenem, cephalosporin, glycylcycline, cephamycin, penam, tetracycline, peptide antibiotic, aminocoumarin, rifamycin, phenicol, triclosan, penem
3000518	CRP	Escherichia coli CRP (98%/78%)	Providencia rettgeri CRP (100%/100%)	transcriptional regulator	antibiotic efflux	penam, macrolide, fluoroquinolone
3000533	MacA (PvdR)	Neisseria gonorrhoeae MacA (37%/94%)	Providencia rettgeri MacA (90%/97%)	ABC	antibiotic efflux	macrolides (erythromycin)
3000535	MacB (PvdT)	Neisseria gonorrhoeae MacB (51%/100%)	Providencia rettgeri MacB (89%/100%)	ABC	antibiotic efflux	macrolides (erythromycin)
3000768	AbeS	Acinetobacter baumannii AbeS (48%/100%)	Providencia rettgeri EmrE4 (89%/100%)	SMR	antibiotic efflux	macrolides, aminocoumarin
3000792	MdtA (YegM)	Escherichia coli MdtA (57%/100%)	Providencia rettgeri MdtA (91%/100%)	RND	antibiotic efflux	aminocoumarin, novobiocin
3000793	MdtB (YegN)	Escherichia coli MdtB (77%/99%)	Providencia rettgeri MdtB (94%/100%)	RND	antibiotic efflux	aminocoumarin, novobiocin
3000794	MdtC (YegO)	Escherichia coli MdtC (73%/100%)	Providencia rettgeri MdtC (95%/100%)	RND	antibiotic efflux	aminocoumarin, novobiocin
3000806	MexG	Pseudomonas aeruginosa MexG (63%/96%)	Providencia rettgeri DoxX (92%/100%)	RND	antibiotic efflux	fluoroquinolone, tetracycline, acridine, vanadium, norfloxacin, acriflavin
3000807	MexH	Pseudomonas aeruginosa MexH (58%/96%)	Providencia rettgeri MdtA1 (93%/100%)	RND	antibiotic efflux	fluoroquinolone, tetracycline, acridine, vanadium, norfloxacin, acriflavin
3000808	MexI	Pseudomonas aeruginosa MexI (78%/100%)	Providencia rettgeri BepE1 (96%/100%)	RND	antibiotic efflux	fluoroquinolone, tetracycline, acridine, vanadium, norfloxacin, acriflavin
3001216	MdtH	Escherichia coli MdtH (75%/100%)	Providencia rettgeri MdtH (98%/100%)	MFS	antibiotic efflux	fluoroquinolone
3001329	MdtG (YceE, TetA-1)	Escherichia coli MdtG (70%/100%)	Providencia rettgeri MdtG (99%/98%)	MFS	antibiotic efflux	phosphomycin, deoxycholate
3002494	SRT-2	Serratia marcescens SRT-2 (56%/100%)	Providencia rettgeri class C beta-lactamase AmpC (86%/99%)	beta-lactamase	antibiotic inactivation	cephalosporins
3002523	AAC(2')-Ia	Providencia stuartii AAC(2')-Ia (70%/87%)	Providencia rettgeri AAC (72%/100%)	aminoglycoside acetyltransferase	antibiotic inactivation	aminoglycosides
3002685	CatIII	Shigella flexneri plasmid-encoded CatIII (56%/1000%)	Providencia rettgeri CAT3 (71%/100%)	chloramphenicol acetyltransferase	antibiotic inactivation	phenicols
3003048	RosA	Yersinia enterocolitica RosA (75%/99%)	Providencia rettgeri fosmidomycin resistance protein Fsr (96%/100%)	MFS	antibiotic efflux	peptide antibiotics (polymyxin B, fosmidomycin)
3003049	RosB	Yersinia enterocolitica RosB (69%/100%)	Providencia rettgeri inner membrane protein YbaL (99%/100%)	MFS	antibiotic efflux	peptide antibiotics (polymyxin B, fosmidomycin)
3003283	RpoB*	Mycobacterium tuberculosis RpoB* (55%/100%)	Providencia rettgeri RpoB (99%/100%)	RNA polymerase subunit beta	antibiotic target alteration	rifamycin (rifampicin)
3003369	EF-Tu*	Escherichia coli EF-Tu* (95%/74%)	Providencia rettgeri EF-Tu (99%/100%)	translation elongation factor Tu	antibiotic target alteration	pulvomycin-class of elfamycins
3003373	AcrR	Klebsiella. pneumoniae AcrR* (52%/100%)	Providencia rettgeri AcrR (94%/99%)	transcriptional regulator	antibiotic efflux	fluoroquinolone, cephalosporin, glycylcycline, penam, tetracycline, rifamycin, phenicols, triclosan
3003577	Ugd (PmrE)	Escherichia coli Ugd/Pmr (73%/96%)	Providencia rettgeri Ugd2 (98%/100%)	UDP-glucose 6-dehydrogenase, phosphoethanolamine transferase	antibiotic target alteration	peptide antibiotics, polymyxin
3003665	NmcR	Enterobacter cloacae NmcR (56%/99%)	Providencia rettgeri transcriptional regulator LysR (89%/100%)	transcriptional regulator	antibiotic inactivation	penam, cephalosporin, cephamycin, carbapenem
3003776	MurA*	Staphylococcus aureus MurA* (50%/99%)	Providencia rettgeri MurA (97%/100%)	UDP-N-acetylglucosamine enolpyruvyl transferase	antibiotic target alteration	phosphomycin
3003801	Bcr1 (Bcr2/3)	Pseudomonas aeruginosa Bcr-1 (34%/98%)	Providencia rettgeri bicyclomycin resistance protein Bcr2/3 (93-98%/100%)	MFS	antibiotic efflux	bicyclomycin
3003801	Bcr1 (Bcr1)	Pseudomonas aeruginosa Bcr-1 (44%/100%)	Providencia rettgeri bicyclomycin resistance protein Bcr1 (93%/100%)	MFS	antibiotic efflux	bicyclomycin (sulfonamid)
3003995	GyrA*	Clostridioides difficile GyrA* (51%/100%)	Providencia rettgeri GyrA (97%/100%)	DNA gyrase subunit alpha	antibiotic target alteration	fluoroquinolone
3004039	EmrE2	Klebsiella pneumoniae QacE (54%/100%)	Providencia rustigianii / Providencia stuartii methyl viologen resistance protein C EmrE1 (90%/100%)	SMR	antibiotic efflux	macrolides, small polyaromatic cations, potentially ethidium bromide, erythromycin (Escherichia coli), tetraphenylphosphonium, methyl viologen, gentamicin, kanamycin, neomycin (P. aeruginosa)
3004122	OmpK37	Klebsiella pneumoniae OmpK37 (56%/98%)	Providencia stuartii OmpD (91%/100%)	porin	antibiotic uptake reduction	cephamycin, penem, monobactam, penam, cephalosporin, carbapenem
3004441	Tet(59)	bacterial Tet(59) (81%/100%)	Providencia rettgeri TetA2 (79%/97%)	MFS	antibiotic efflux	tetracycline
3004580	KpnE (MdtJ)	Klebsiella pneumoniae KpnE (64%/100%)	Providencia rettgeri spermidine export protein MdtJ (95%/100%)	SMR	antibiotic efflux	macrolides, aminoglycosides, cephalosporin, tetracycline, peptide antibiotics, rifamycin
3004583	KpnF (MdtI)	Klebsiella pneumoniae KpnF (71%/100%)	Providencia rettgeri spermidine export protein MdtI (99%/82%)	SMR	antibiotic efflux	macrolides, aminoglycosides, cephalosporin, tetracycline, peptide antibiotics, rifamycin
3004588	KpnG (EmrA)	Klebsiella pneumoniae KpnG (65%/100%)	Providencia rettgeri multidrug export protein EmrA2 (92%/100%)	MFS	antibiotic efflux	peptide antibiotics, carbapenem, macrolides, cephalosporin, aminoglycosides, penam, fluoroquinolones, penem, nalidixic acid, thiolactomycin
3004597	KpnH (EmrB)	Klebsiella pneumoniae KpnH (78%/99%)	Providencia rettgeri multidrug export protein EmrB (98%/99%)	MFS	antibiotic efflux	peptide antibiotics, carbapenem, macrolides, cephalosporin, aminoglycosides, penam, fluoroquinolones, penem, nalidixic acid, thiolactomycin
3005069	CsrA (RsmA)	Pseudomonas aeruginosa RsmA (88%/100%)	Providencia rettgeri / Providencia stuartii CsrA (100%/100%)	RND	antibiotic efflux	phenicol, diaminopyrimidine, fluoroquinolone
3005162	FosA7.5	Escherichia coli FosA7.5 (62%/98%)	Providencia rettgeri glutathione transferase FosA (74%/100%)	phosphomycin thiol transferase	antibiotic inactivation	phosphomycin
